# Supplementary material for: Ultrathin black phosphorus as a pivotal hole extraction layer and oxidation evolution co-catalyst boosting solar water oxidation
Source: Royal Society of Chemistry journal article supplement (doi:10.1039/d2qi00120a), 2022-01-01
Supplement: d2qi00120a1.pdf [file d2qi00120a1.pdf]

# **Ultrathin black phosphorus as pivotal hole extraction layer and oxidation evolution cocatalyst boosting solar water oxidation**

Biyi Chen, Dan Li, Xiaojie Wu, Shuang Deng, Longhua Li, Weidong Shi\*

School of Chemistry and Chemical Engineering, Jiangsu University, Zhenjiang, 212013, P. R.  
China

\*Corresponding author, E-mail: [swd1978@ujs.edu.cn](mailto:swd1978@ujs.edu.cn)

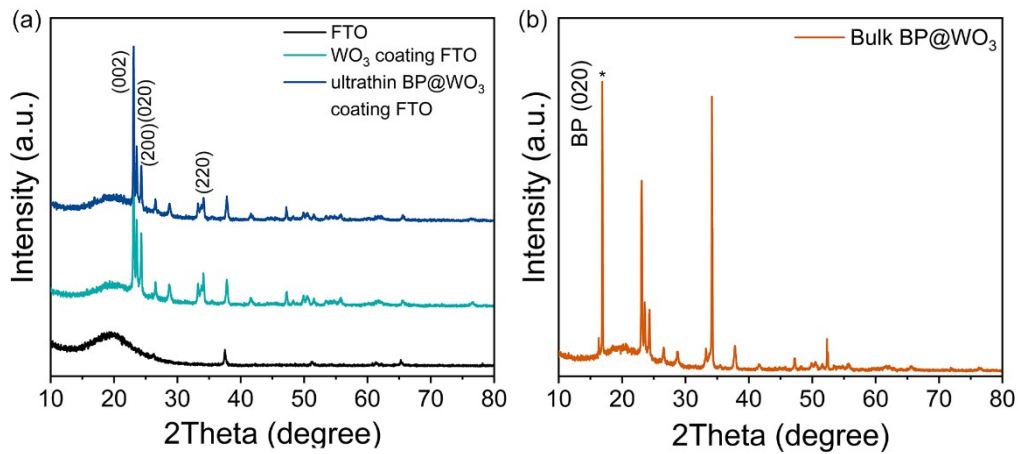

**Fig. S1** (a) XRD patterns of the FTO substrate, WO<sub>3</sub> coating FTO substrate, and BP@WO<sub>3</sub> coating FTO substrate. (b) XRD pattern of bulk BP crystals decorated WO<sub>3</sub> photoanode.

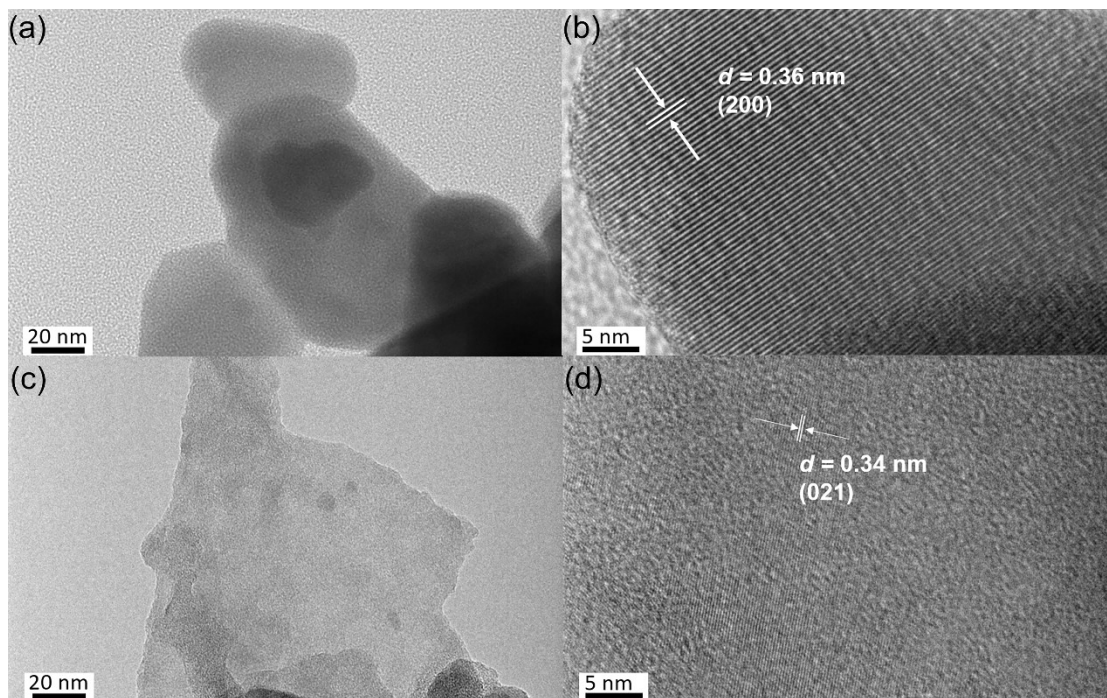

**Fig. S2** TEM and HRTEM images of the WO<sub>3</sub> nanosheet (a), (b) and the exfoliated BP nanosheet (c), (d).
